# Supplementary material for: Biodegradable Metal Complex-Gated Organosilica for Dually Enhanced Chemodynamic Therapy through GSH Depletions and NIR Light-Triggered Photothermal Effects
Source: MDPI journal article supplement (doi:10.3390/molecules29051177), 2024-03-06
Supplement: s1 [file s1]

## *Supplementary Information*

### **Biodegradable Metal Complex-Gated Organosilica for Dually Enhanced Chemodynamic Therapy through GSH Depletions and NIR Light-Triggered Photothermal Effects**

**Lin Kong <sup>1,2</sup>, Jian Li <sup>1,2,\*</sup>, Yunxiu Zhang <sup>1,2</sup>, Jian Wang <sup>1,2</sup>, Ke Liang <sup>1,2</sup>, Xiaokuang Xue <sup>1,2</sup>, Tiejin Chen <sup>1,2</sup>, Yongliang Hao <sup>1,2</sup>, Haohui Ren <sup>1</sup>, Pengfei Wang <sup>1,2</sup> and Jiechao Ge <sup>1,2,\*</sup>**

- <sup>1</sup> Key Laboratory of Photochemical Conversion and Optoelectronic Materials and CityU-CAS Joint Laboratory of Functional Materials and Devices, Technical Institute of Physics and Chemistry, Chinese Academy of Sciences, Beijing 100049, China; konglin20@mails.ucas.ac.cn (L.K.); zhangyunxiu114@mails.ucas.ac.cn (Y.Z.); wangjian18@mails.ucas.edu.cn (J.W.); liangke18@mails.ucas.ac.cn (K.L.); xuexiaokuang19@mails.ucas.ac.cn (X.X.); chentiejin20@mails.ucas.ac.cn (T.C.); haoyongliang22@mails.ucas.ac.cn (Y.H.); lindaroxanneren@mail.ipc.ac.cn (H.R.); wangpf@mail.ipc.ac.cn (P.W.)
- <sup>2</sup> School of Future Technology, University of Chinese Academy of Sciences, Beijing 100049, China
- \* Correspondence: lijian191@mails.ucas.ac.cn (J.L.); jchge2010@mail.ipc.ac.cn (J.G.)

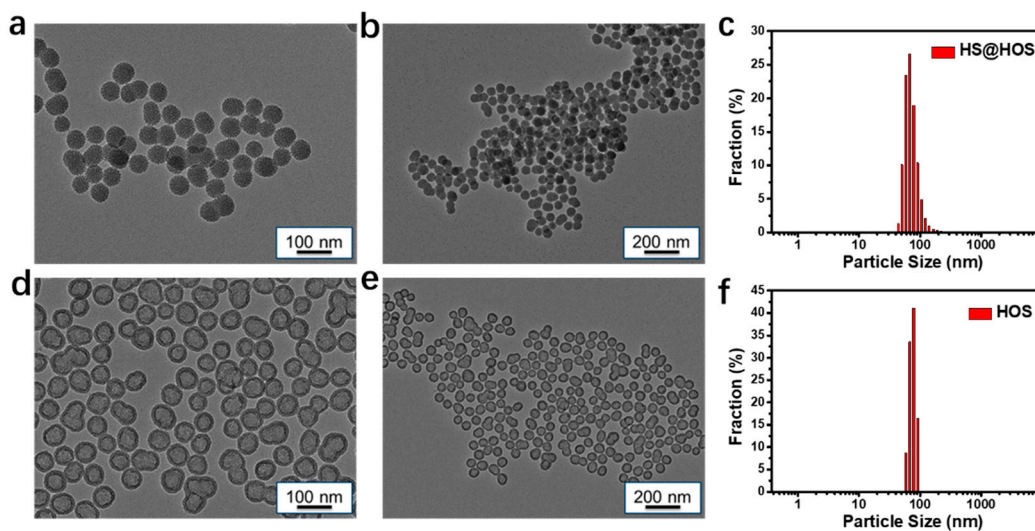

**Figure S1.** TEM images of (a,b) HS@HOS and (d,e) HOS with different resolution, along with the size distribution of (c) HS@HOS and (f) HOS by DLS, respectively.

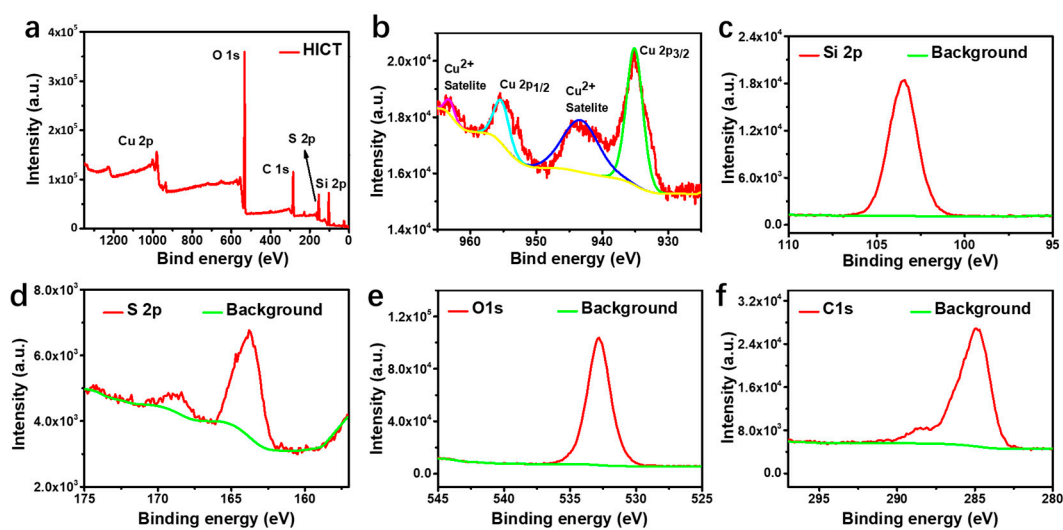

**Figure S2.** (a) XPS spectrum of HICT. (b-f) High-resolution XPS spectra of (b) Cu 2p, (c) Si 2p, (d) S 2p, (e) O 1s, (f) C 1s in HICT.

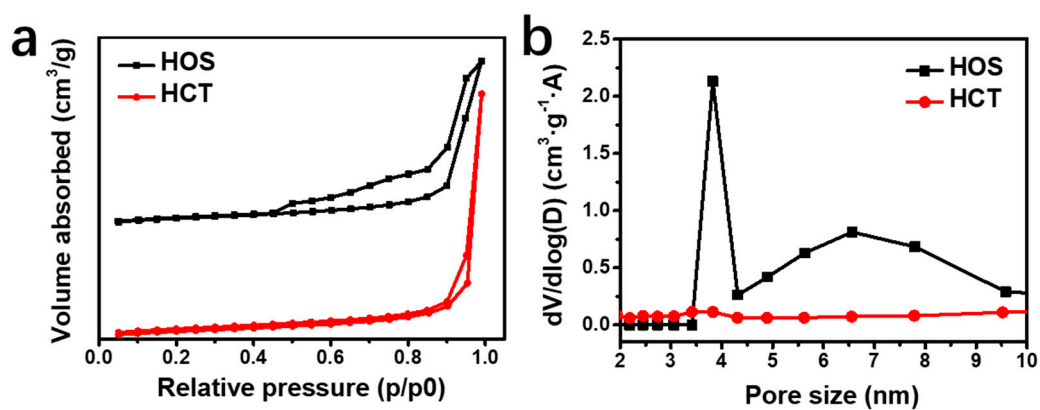

**Figure S3.** (a) Nitrogen adsorption-desorption isotherms of HOS and HCT, (b) Pore size distribution of HOS and HCT.

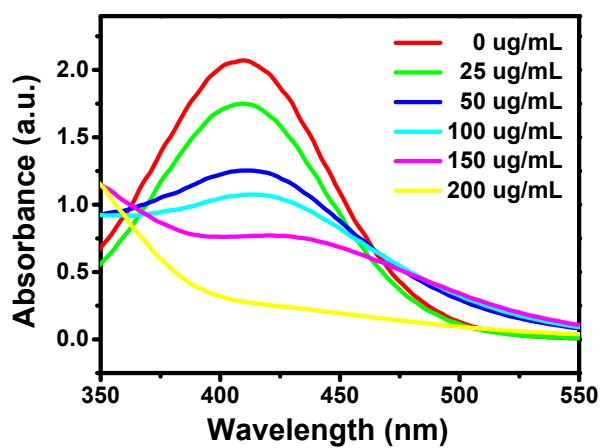

**Figure S4.** The ability of DTNB to detect GSH consumption of HICT at different concentrations.

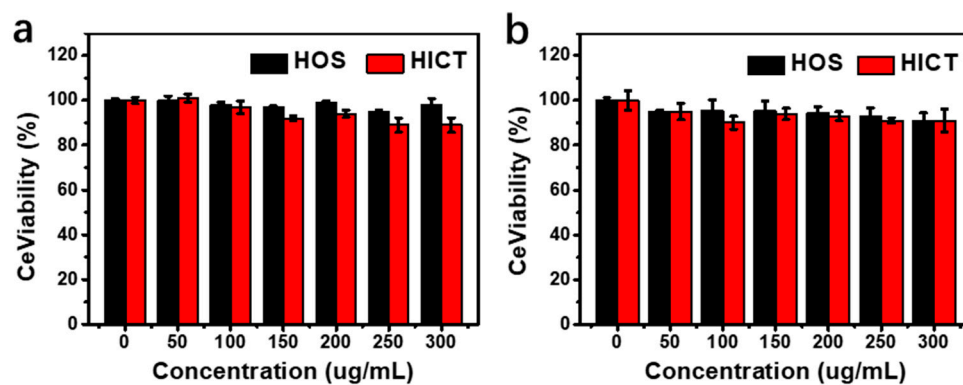

**Figure S5.** Cytotoxicity of HU-EVC cells (a) and MCF-10A cells (b) after being treated by different concentrations of HOS and HICT for 24 h.

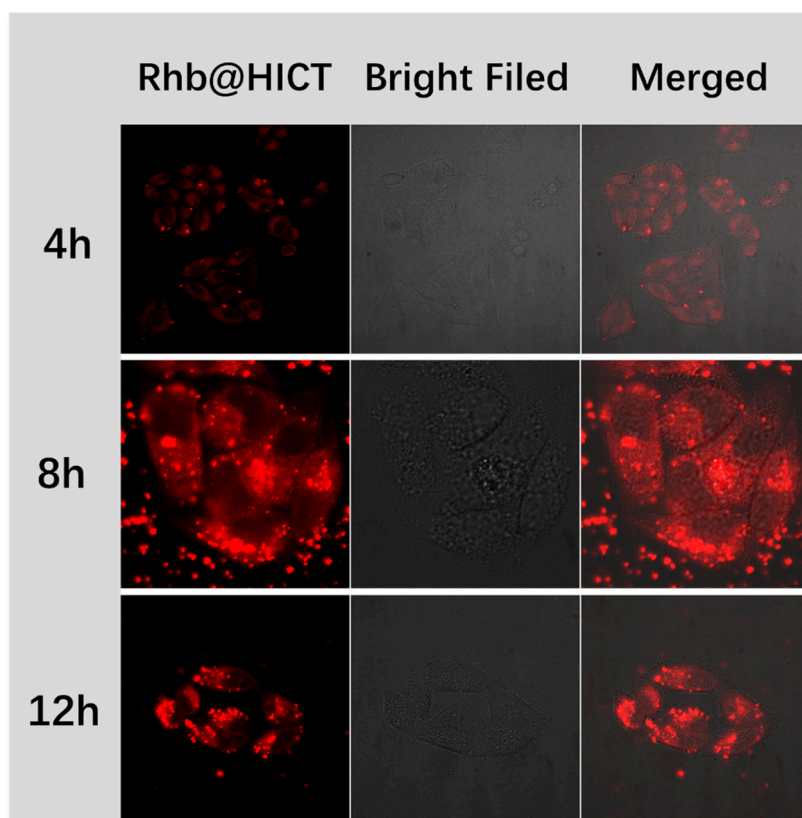

**Figure S6.** CLSM images of cellular uptake of Rhb@HICT after 4, 8, 12h.

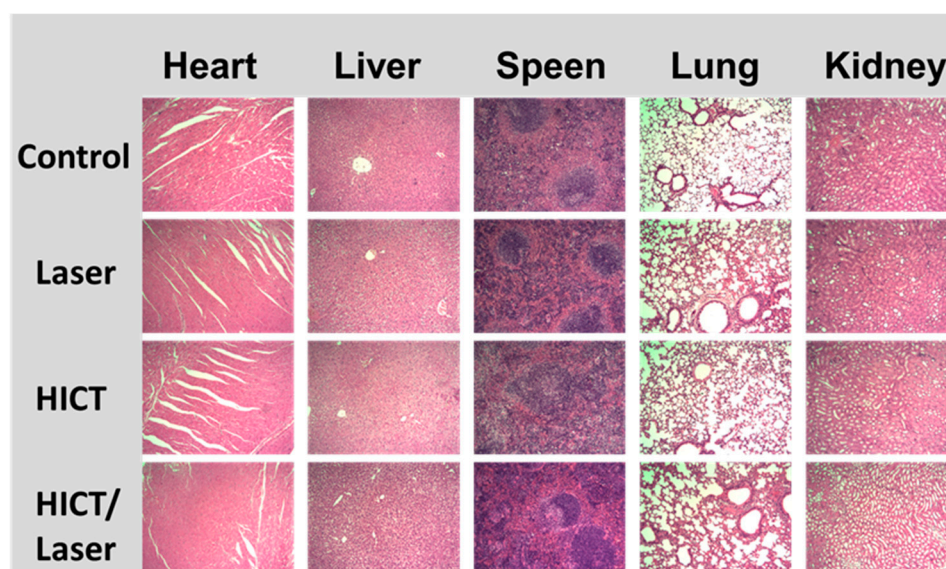

**Figure S7.** The H&E Staining images of major organs after different treatments.
